# Supplementary material for: Cell wall-associated transition metals improve alkaline-oxidative pretreatment in diverse hardwoods
Source: Royal Society of Chemistry journal article supplement (doi:10.1039/c5gc01748c), 2015-10-13
Supplement: c5gc01748c2.xlsx [file c5gc01748c2.xlsx]

## Sheet: Sheet1
										Oxlate Extract																					Carbonate Extract
				Hybrid Poplar					Hybrid Aspen					Silver Birch					Sugar Maple							Hybrid Poplar					Hybrid Aspen					Silver Birch					Sugar Maple							Hybrid Poplar
				Untreated	Alkali	AHP	Cu-AHP		Untreated	Alkali	AHP	Cu-AHP		Untreated	Alkali	AHP	Cu-AHP		Untreated	Alkali	AHP	Cu-AHP				Untreated	Alkali	AHP	Cu-AHP		Untreated	Alkali	AHP	Cu-AHP		Untreated	Alkali	AHP	Cu-AHP		Untreated	Alkali	AHP	Cu-AHP				Untreated	Alkali
CCRC-M95	Non-Fucosylated			5.46576	9.93768	33.2862	107.218		354.769	34.8015	97.1696	959.02	`	4.54986	36.794	21.0028	58.0082		1.02253	51.1337	3.93606	8.04112				20.4217	12.3213	5.87339	33.1606		28.677	91.6273	187.707	82.4031		19.8547	0.419665	1.93547	5.41661		0.912033	2.63916	2.34281	8.46536				2687.05	1900.49
CCRC-M101	Xyloglucan-1			3.64384	4.96884	29.5878	88.7528		304.949	0	20.2609	905.436		3.45789	39.7773	15.7521	47.6105		1.15035	55.3843	3.63329	9.49299				13.4697	10.2847	3.86407	20.6027		26.605	38.9644	166.528	43.4318		16.0191	0.727419	4.03924	4.06245		1.40313	1.7774	3.28815	8.64807				2488.76	1493.86
CCRC-M104				2.32452	3.12853	21.821	102.453		373.088	30.6755	123.219	931.083		2.65712	31.3246	17.5023	34.4766		1.80541	49.6746	2.62404	9.04626				10.8626	7.33166	2.55029	18.4444		31.7437	76.4068	202.035	77.2383		14.2142	0.223821	5.80641	2.7083		1.43821	2.80075	2.91823	8.89167				1881.19	1661.13
CCRC-M89	Non-Fucosylated			0.502599	1.47225	13.6843	29.1871		139.629	7.71373	22.3283	878.415		4.47706	14.0878	28.0037	29.0041		1.18231	37.8745	0.201849	1.8986				2.17253	3.46217	1.15922	3.72812		71.8584	32.2674	136.42	6.10394		28.2027	3.74901	7.99433	16.5206		0.491095	0.996419	0.534324	1.33984				1179.56	1508.28
CCRC-M93	Xyloglucan-2			0	1.65628	7.76679	16.6784		158.395	2.33206	28.1172	940.701		0.218393	10.6073	14.4394	9.85045		0.239656	27.2163	0.252312	3.35047				0.217253	1.01829	0.231844	4.31677		3.89544	10.9588	64.9916	2.34767		2.25622	0	0.673207	0.677076		0.245547	0.430884	0.267162	1.40074				462.671	624.364
CCRC-M87				1.88475	3.12853	26.9988	49.4395		302.939	22.9618	50.859	847.73		2.18393	29.5015	10.939	29.0041		1.96518	42.8864	1.81664	5.69579				9.55911	9.36823	2.47301	13.3427		32.4067	68.34	205.564	30.9892		11.958	0.0419665	3.78679	2.7083		0.841877	1.93898	2.75383	6.33379				1248.2	1727.46
CCRC-M88				1.38215	1.28822	24.0401	52.4177		286.183	19.5534	59.5422	896.276		1.05557	26.6839	4.81314	26.8151		0.671038	41.5541	1.81664	6.47757				8.47285	8.45177	1.93204	10.9881		16.3277	67.7312	204.319	30.0501		7.89676	0.139888	2.18792	1.48957		0.526173	1.83126	2.63052	5.66387				1423.6	1691.41
CCRC-M100	Non-Fucosylated			0	0.736125	0.739694	1.78697		6.25537	0	2.89441	435.544		0.291191	1.65739	4.37558	0		0.639084	1.77636	2.82589	0.335047				0	0.305486	0	0		1.32611	0	3.11461	0.7043		0.902487	0.167866	0.673207	0		0.631408	0.134651	0.369917	0.97443				33.0479	28.839
CCRC-M103	Xyloglucan-3			0	0.736125	1.10954	2.97828		4.46812	0.358778	2.89441	430.506		0.218393	0.828694	6.56337	0.273624		0.175748	1.01506	0.807397	1.00514				0.325879	0	0.231844	0		0.165763	0.380512	3.11461	1.64337		1.80497	0.0699442	0.841509	0.203123		0.456017	0	0.369917	0.243607				27.9636	21.6292
CCRC-M58				0	0.0920156	3.69847	14.2957		90.9262	3.94656	11.9911	891.697		16.8527	121.652	181.587	284.569		1.18231	19.3496	0.908322	0.893458				0.86901	0.814629	0	0.392433		35.1418	17.9602	81.1876	3.28673		75.132	25.3757	57.6433	75.8325		0.736642	0.780977	0.616528	0.365411				683.838	579.664
CCRC-M86	Non-Fucosylated			0.188475	0	0.184924	4.16959		296.907	1.07633	6.20232	277.997		2.76631	31.9876	10.5014	34.4766		0.271611	0.570972	0.151387	0				0.651758	0.152743	0	0.294325		32.8211	0.913229	4.5681	0.234767		11.958	0.307754	4.71245	2.7083		0.105235	0.0538605	0	0.121804				25.4215	17.3034
CCRC-M55	Xyloglucan-4			0.12565	0.736125	2.21908	7.74353		50.2663	1.43511	8.68324	560.573		0.837174	10.6073	5.2507	8.20871		0.175748	5.26563	1.2111	0.50257				0.86901	0.509143	0.115922	0.196217		27.8482	4.41394	17.4418	1.64337		20.5316	0.979218	1.26226	2.16664		0.526173	0.175047	0.164407	0.365411				188.119	124.008
CCRC-M52				0	0.0920156	6.2874	11.3175		71.0431	0.0896946	7.85627	751.553		0	6.79529	5.2507	3.83073		1.39001	10.785	0.252312	0.781776				0.217253	0.610972	1.00466	0		2.73509	7.45804	31.7691	1.17383		0.676865	0.167866	0.589056	0.203123		0.245547	0.323163	0.123306	0.487215				424.539	405.188
CCRC-M99				0.0628248	0.736125	3.32862	8.33919		113.267	1.25572	4.54837	926.961		0.181994	11.9332	4.37558	11.4922		0.431382	11.2291	0.504623	0.558411				0	0.407314	0.309126	0		4.39273	6.08819	26.578	23.4767		1.80497	0.195844	0.589056	0		0.491095	0.296233	0.411019	0.852626				294.889	281.18
CCRC-M54				0.0628248	1.47225	4.43817	4.76525		37.5322	0.538167	0.826976	639.347		0.218393	5.96659	3.93802	7.11421		0.766901	5.90005	1.61479	0.50257				0.86901	0.203657	0.154563	0		2.07204	2.28307	14.3272	0		1.57935	0.195844	0.92566	0.27083		0.59633	0.188512	0.369917	0.913528				155.071	100.936
CCRC-M48				1.2565	3.12853	5.54771	8.33919		10.9469	3.229	13.6451	436.002		0.145595	0.580086	3.50046	0.820871		0.367473	1.45915	0.302774	2.45701				3.25879	0.509143	0.927377	2.55082		0.372967	4.41394	21.1794	4.46057		0.902487	0.083933	0.420754	0.406245		0.912033	0.673256	0.123306	4.22659e-16				111.855	69.2136
CCRC-M49	Non-Fucosylated			0.0628248	0.920156	1.10954	2.06097e-15		69.4793	0	0	113.58		0	5.63512	8.3136	12.0394		0.159771	0.253765	0	0.949299				0.217253	0.203657	0.231844	0		1.8234	0	1.0382	0.939067		0	0.167866	0.841509	1.89581		0	0.350093	0.739834	0.578568				15.2529	12.9775
CCRC-M96	Xyloglucan-5			0	2.57644	3.32862	4.76525		41.7769	0.896946	6.20232	381.501		0.218393	1.49165	6.12581	0.820871		0.702992	4.37745	1.41295	1.56355				6.95208	1.62926	0.386407	0		2.90086	3.65292	11.2126	0.7043		0.676865	0.167866	1.17811	0		0.0701564	0.269302	0.822037	0.913528				106.77	121.124
CCRC-M50				0	2.02434	1.47939	4.16959		4.91493	0.0896946	4.54837	582.557		0.109197	0	1.75023	0.273624		0.782878	9.32588	0.100925	0.781776				0.217253	0.305486	0	0		0.0828816	1.67425	16.6113	1.4086		0	0	0.589056	0		0.420939	0.538605	0.411019	0				155.071	92.2847
CCRC-M51				0	1.10419	0.369847	2.38262		173.363	0.179389	0.826976	131.442		0	13.0934	5.68825	12.5867		0.223679	0.317207	0.454161	1.56355				0	0.305486	0.0772814	0		4.0612	0.152205	1.86877	2.03778e-16		0.112811	0.167866	1.17811	0.473953		0.280626	0.228907	0.0205509	0.152255				11.4397	10.0936
CCRC-M53				0.0314124	0	0.739694	5.95656		90.4794	0.179389	2.89441	553.246		1.2594e-16	6.79529	3.06291	3.28348		0.415405	4.94843	0.353236	0.335047				0.325879	0	0	0		1.57475	3.65292	24.294	1.17383		1.35373	0.223821	0.504905	0		0.175391	0.242372	0.246611	0.852626				208.456	149.963
CCRC-M57	Non-Fucosylated Xyloglucan-6			0	1.10419	3.69847	2.38262		32.8407	0.358778	0.413488	100.757		0.545983	15.9109	7.00093	9.85045		0.415405	0	0.706473	0.223364				0.434505	0.610972	0.386407	0.196217		4.30984	0	1.45349	0.234767		7.44552	0.0559553	1.09396	0.27083		0.420939	0.188512	0.493222	0.243607				12.7107	8.65169
CCRC-M102				0.314124	2.9445	7.0271	14.8914		72.3835	6.27862	55.8209	804.679		0.509584	8.61841	2.18779	7.66146		1.64564	26.2647	2.22034	2.56869				2.17253	1.93474	0.695533	2.74703		10.2773	21.4609	76.6195	40.1451		3.1587	0.0279777	1.00981	0		0.876955	0.915628	1.23306	2.25337				612.658	477.285
CCRC-M39	Fucosylated			0.439774	2.11636	8.50649	14.8914		62.7771	8.43129	37.6274	670.032		14.3776	87.51	68.2591	161.985		0.303565	16.4948	0.454161	2.45701				2.38978	2.64754	0.850096	2.55082		41.8552	26.1792	89.0779	10.5645		92.9562	15.9752	32.4822	69.0617		0.561251	0.646326	1.23306	1.82706				470.298	746.93
CCRC-M106	Xyloglucan			1.44497	7.54528	26.629	64.9265		221.172	25.832	78.1492	1008.94		1.41956	38.2856	5.68825	43.7798		1.27817	50.6262	6.15641	10.8332				7.38659	7.33166	3.09126	13.9314		31.2464	88.7354	245.847	15.9641		12.8604	0.699442	4.6283	2.43747		2.10469	2.96233	5.30214	9.6834				2252.34	1430.41
CCRC-M84				0.188475	0.368062	4.06832	3.57394		167.554	0.896946	7.02929	612.784		8.33534	25.8552	39.8178	57.4609		0.0958626	11.356	1.91757	0.558411				0.434505	0.610972	0.309126	0		83.7933	6.3926	33.0149	2.8172		46.2525	9.06476	16.0728	29.3851		0.315704	0.134651	0.739834	0.548117				216.083	206.199
CCRC-M1				4.27209	12.1461	39.9435	71.4787		342.258	16.6832	50.032	916.428		2.11113	42.2634	7.43849	53.6302		3.73864	46.6294	6.9638	16.9757				8.47285	8.75726	1.39107	10.5957		32.4896	73.9716	226.744	35.215		16.4704	0.307754	2.77698	2.97913		4.06907	2.5853	4.3568	8.22175				1337.17	1374.18
CCRC-M111	Xylan-1/XG			0.188475	0	0.554771	1.78697		8.04262	0	3.72139	132.816		0	0.745824	6.12581	3.83073		0.319542	1.0785	0.908322	0.335047				0.86901	0	0.193204	0.392433		0	0	1.24585	2.58243		0	0.153877	0.168302	0.541661		0.841877	0.538605	0.0411019	0.304509				17.795	0
CCRC-M108				0	3.86465	0	10.7218		53.8408	0.269084	3.92813	663.62		0.109197	4.97216	2.62535	3.28348		0.639084	2.66454	0.504623	0				1.95527	0	0.0772814	0.58865		2.32069	3.50071	11.6279	6.57347		2.25622	0.47562	0.92566	1.08332		0.0350782	0	0.411019	0				73.7223	73.5394
CCRC-M109				0.345537	0.736125	0	11.3175		68.1388	1.25572	4.54837	770.331		0.109197	5.46938	1.0939	4.37798		0.255634	5.13875	0.0504623	1.17266				1.41214	0	0	0.686758		0.828816	3.34851	18.6877	2.58243		0	0	0.210377	0		0.157852	0.0942559	0.616528	0				193.203	138.427
CCRC-M119	Xylan-2			0.0628248	0.460078	0.924618	8.33919		2.68087	1.43511	24.8093	21.5253		0.0363989	0.165739	6.12581	0.547247		0.119828	0	0	0				1.30352	0.305486	0.231844	1.56973		1.07746	1.82646	13.0814	0.117383		2.0306	0.307754	2.10377	1.62498		0	0	0.164407	0.0609019				22.8793	2.16292
CCRC-M115				0.0314124	3.12853	1.84924	4.16959		3.12768	0.358778	35.5599	15.5715		0	1.32591	8.75116	1.64174		0.0319542	0.126883	0.302774	0.223364				0.651758	0.610972	0.772814	2.74703		1.16034	1.82646	6.02159	21.129		1.57935	0.335732	1.93547	2.16664		0.0350782	0	0.287713	0				10.1686	1.44195
CCRC-M110				0.502599	3.68062	4.43817	7.74353		7.5958	0.538167	19.0204	5.03783		0.473185	0.994432	11.8141	8.20871		0.431382	0.824738	0.100925	1.2285				1.95527	0.203657	0.772814	0.686758		0.828816	0	5.19102	5.16487		2.48184	0.391687	1.68302	1.21874		0.841877	0.754047	0	0.121804				22.8793	2.8839
CCRC-M105				0.12565	1.28822	1.84924	10.7218		2.23406	2.33206	31.8386	23.8152		0.181994	0.331477	7.00093	0.547247		0.255634	0	0.555086	0.837617				1.95527	1.01829	1.15922	3.92433		1.90628	3.1963	21.387	21.5985		0.676865	0.391687	1.26226	1.35415		0.771721	0.242372	0.452121	0.243607				15.2529	4.32585
CCRC-M117	Xylan-3			0.376949	0.920156	2.58893	10.7218		2.45747	0.896946	43.0027	5.9538		0.254792	0.497216	6.12581	1.64174		0.0479313	0.380648	1.31202	0.111682				3.04154	0.814629	0.850096	2.74703		1.90628	2.13087	6.22923	16.6684		1.57935	0.447643	2.01962	2.84372		0.0701564	0.0538605	0.0411019	0.426313				119.481	1.44195
CCRC-M113				0.12565	2.57644	2.21908	13.7001		27.7023	2.87023	40.9353	38.0127		0.618781	0	5.2507	3.83073		0.215691	0.507531	0.605548	1.78692				4.1278	0.509143	1.2365	5.69028		3.1495	5.93599	27.4086	6.3387		8.348	0.699442	2.27207	4.73953		0.420939	0.377023	0.452121	0.609019				48.3008	0
CCRC-M120				0.314124	4.04869	5.17786	2.38262		54.9579	63.6832	220.802	5.49582		0.727977	0	6.12581	0.820871		0.655061	0	0.504623	0.893458				2.60703	2.54572	1.00466	0.392433		77.3286	127.548	154.277	115.27		9.92736	0	0.504905	0		0	0.188512	0.65763	0.121804				76.2645	17.3034
CCRC-M118				0.753898	3.49659	3.69847	7.14787		68.1388	67.4503	252.641	6.86977		1.49235	0.165739	8.3136	0		1.35805	0	0.706473	0				3.47604	1.22194	0.772814	1.1773		77.9087	119.481	145.349	24.8853		15.3423	0.195844	1.09396	0		0	0	0	0.304509				106.77	8.65169
CCRC-M116				0.0628248	0	0	2.97828		19.6597	13.813	150.51	1.37395		0.145595	0	3.06291	0		1.05449	0.824738	0.504623	0				0.434505	0	0.115922	0		17.7367	32.724	33.8455	31.9283		0.676865	0.083933	0.673207	0.27083		0.736642	0.215442	0	0				30.5058	0
CCRC-M114				0.188475	0.552094	3.69847	7.14787		51.6068	37.3129	217.495	4.57985		0.582382	0	9.18872	0		1.62966	1.77636	0.100925	0				1.30352	1.4256	0.309126	0.196217		50.8893	84.6259	78.6959	90.8547		3.60995	0.307754	0.589056	0		0.491095	0.215442	0.123306	0				40.6744	38.9326
CCRC-M154	Xylan-4			1.69627	5.889	6.2874	16.6784		3.7979	9.50763	15.299	91.139		0.691578	13.9221	28.0037	38.3073		4.23393	54.6865	65.5001	92.5846				4.5623	1.62926	0.618251	2.15838		1.32611	3.80512	10.5897	3.28673		4.51244	0.447643	2.18792	2.30206		4.52509	19.0128	34.4023	47.3817				78.8066	21.6292
CCRC-M150				8.04158	65.3311	228.935	477.716		83.5538	128.981	308.048	531.262		7.75296	83.6981	264.285	354.069		2.89185	36.7326	38.3514	46.1248				101.891	92.4604	77.7451	195.039		75.0079	187.516	256.436	203.073		293.76	28.7331	61.7667	137.853		6.80517	13.0881	15.0022	29.3547				2595.54	790.188
CCRC-M144	Xylan-5			48.1238	226.174	477.473	1042.4		318.8	310.881	640.906	944.823		50.922	267.005	622.208	618.389		4.58543	100.808	125.752	135.917				401.7	215.469	170.56	426.575		126.477	313.085	454.318	350.742		488.471	47.618	148.274	237.112		46.1278	41.0148	52.0761	106.639				3325.13	1488.09
CCRC-M146				51.5792	289.849	584.359	1111.49		288.417	313.572	601.625	991.995		52.924	270.486	748.224	705.949		6.4867	103.854	142.203	145.857				431.029	214.655	169.092	418.726		169.824	316.282	407.184	430.327		481.928	57.662	120.841	201.904		52.6173	25.3414	64.3655	111.024				4001.34	1883.19
CCRC-M145				56.1654	299.787	575.112	1124		258.704	297.786	656.619	840.402		49.1021	292.529	739.473	729.48		5.7198	104.298	143.313	147.086				431.463	212.313	168.473	421.081		167.172	309.585	432.724	378.444		476.513	58.5852	128.667	282.341		50.6529	27.4689	69.1745	109.806				4415.71	1995.66
CCRC-M155				43.9146	298.683	490.417	632.587		255.576	295.454	722.777	978.714		47.9373	213.803	458.998	659.98		3.86646	86.6609	104.962	138.374				392.575	215.469	174.038	424.024		167.421	318.717	420.265	370.462		459.366	53.5213	163.169	239.008		46.198	32.9088	72.9558	110.415				2798.91	1479.44
CCRC-M153	Xylan-6			42.4068	279.911	439.748	668.922		41.3301	249.71	664.888	851.394		55.1807	246.288	476.938	768.882		5.68785	87.0416	109.301	129.328				357.38	186.957	164.068	390.471		112.305	270.925	313.33	360.367		418.98	48.905	144.15	226.008		44.2336	36.6251	61.8583	95.7377				2379.45	1280.45
CCRC-M151				49.2547	242.553	398.695	953.05		49.8195	225.492	560.689	929.709		61.6233	226.565	583.265	841.119		4.48956	69.6586	103.952	99.7322				389.751	213.331	159.2	432.854		98.3805	309.585	444.559	302.614		487.117	55.3678	98.2882	200.279		45.9525	36.4636	48.829	100.062				3004.82	1362.64
CCRC-M148				53.2755	260.772	551.442	936.371		41.7769	269.801	560.689	946.197		57.3282	281.922	638.397	846.044		5.87957	95.2889	136.046	143.177				377.368	197.446	161.518	404.991		122.25	300.3	416.528	331.491		448.31	49.9401	99.9712	144.488		45.3912	40.9609	57.9947	97.7475				4064.9	1557.31
CCRC-M140				13.8843	268.87	547.374	1056.69		35.2981	261.549	592.941	956.272		38.0732	231.371	623.083	678.586		2.98772	101.887	134.129	142.283				391.489	204.065	177.593	428.733		144.38	303.192	408.222	333.369		477.641	45.5197	157.699	234.539		57.7387	42.846	60.2964	109.136				4067.44	1525.58
CCRC-M139				32.4176	245.866	457.871	903.61		60.543	278.95	566.478	938.869		47.6825	221.758	653.712	784.752		3.08358	94.147	129.285	142.953				405.61	198.464	176.356	413.036		142.474	285.993	367.94	371.166		429.358	56.0952	101.149	278.007		54.5466	25.5029	49.1989	111.999				3335.3	1384.27
CCRC-M138				50.7625	265.189	577.331	932.202		44.2344	257.782	516.446	832.616		47.5005	295.181	686.091	788.583		5.54405	92.6878	140.285	134.689				379.106	184.004	162.523	371.438		120.344	261.792	357.35	349.333		166.96	45.9113	122.776	255.664		45.1457	28.4114	57.0494	105.908				3963.21	1544.33
CCRC-M160	Xylan-7			78.4054	313.957	553.291	977.472		134.714	272.672	797.618	1011.23		73.4165	248.111	582.827	775.996		15.2901	104.044	129.285	158.812				438.633	216.793	180.22	457.773		148.192	292.233	395.764	462.96		458.689	46.5269	138.596	264.872		55.5639	49.9556	73.449	116.505				4151.33	1888.95
CCRC-M137				84.1225	308.068	663.136	1161.53		140.746	306.576	625.607	926.045		67.3015	329.489	874.679	1144.29		21.2176	110.959	165.315	162.833				477.087	216.589	171.178	413.429		128.052	313.238	463.454	427.98		469.068	58.6132	113.856	284.236		56.5812	47.8012	60.7075	107.735				4268.27	1838.49
CCRC-M152				66.72	319.478	596.564	889.91		98.9689	258.5	738.489	842.234		58.129	279.933	563.137	853.158		16.4085	82.9813	111.219	137.146				388.447	185.837	156.572	376.736		129.13	276.708	350.498	440.188		393.259	39.5045	143.393	211.248		47.0048	40.0453	63.8723	99.27				3653.07	1591.91
CCRC-M149				111.388	373.951	658.698	1253.86		253.342	333.484	722.777	1006.19		79.8227	338.273	916.247	1135.54		25.5314	95.4793	158.553	147.421				469.917	223.106	169.478	446.589		138.081	331.198	469.061	464.369		476.288	55.2279	123.365	208.539		60.9309	45.5121	57.2549	106.822				4146.25	1711.59
CCRC-M75	Galactomannan-1			0.251299	0	3.51355	2.97828		56.7451	0.896946	6.20232	0		17.0711	107.399	158.834	323.423		0.00798855	0.348928	0.100925	0.223364				0.86901	0	0.115922	0.981083		15.2502	0.913229	5.19102	3.05197		32.7152	25.7954	52.2577	125.124		0.0175391	0.363558	0.0411019	0				20.3372	0.720975
CCRC-M70				0.0314124	0.644109	0	0.893484		181.629	1.25572	1.65395	2.06093		10.5193	2.32034	2.18779	0		0.702992	0.317207	0.504623	0				0.325879	0	0	0		29.7545	0.380512	4.5681	2.8172		6.99427	0.517587	0.210377	0.947906		0.491095	0.0538605	0.739834	0.669921				13.9818	0
CCRC-M74				0.502599	1.47225	5.17786	11.3175		3.35109	0.896946	8.26976	4.12186		0.254792	0.911563	7.87605	9.3032		0.0639084	0	0.807397	1.2285				2.17253	0	0.734173	0.784867		0.290086	1.36984	5.39866	6.3387		3.83557	0.125899	1.59887	1.01561		0	0.0269302	0	0.121804				30.5058	0
CCRC-M166	Galactomannan-2			0.12565	0.736125	1.84924	2.97828		3.12768	2.33206	4.96185	4.57985		0.363989	0.497216	5.68825	2.73624		0.159771	0.190324	1.71572	0.446729				0.86901	0.407314	0.309126	0		0.828816	1.06543	4.36046	3.28673		0.451244	0.139888	0.757358	0.27083		0.631408	0.0269302	0.102755	0.609019				27.9636	0
CCRC-M168				0.188475	0.920156	0.739694	5.3609		1.11703	1.6145	2.89441	1.60295		1.31036	0	6.12581	1.64174		1.1184	0	0	0				1.95527	0.407314	0	0.784867		0.663053	1.52205	4.77574	2.8172		2.0306	0.335732	0.92566	0.27083		0.175391	0.0538605	0	0				12.7107	0
CCRC-M174				0	1.47225	1.47939	1.78697		2.45747	0	0.413488	3.20589		0.0363989	0	2.18779	0		0.271611	0	0.201849	0				0.217253	0.814629	0.309126	0		1.16034	0	2.49169	0		0	0.335732	0.504905	0.0677076		0.157852	0.161581	0.0822037	0.243607				27.9636	7.20975
CCRC-M175				0.0314124	1.10419	0	5.95656		3.5745	0.98664	3.72139	1.83194		0.32759	0.165739	3.06291	0		0.734947	0.190324	0.706473	0.837617				14.1214	1.01829	0	0.0981083		2.07204	2.58748	6.22923	0.7043		0	0.167866	0.168302	0.27083		0.210469	0.0538605	0.328815	0.152255				20.3372	0
CCRC-M169	Acetylated Mannan			128.728	6.44109	12.205	41.6959		287.3	5.38167	22.3283	17.4034		68.0659	1.65739	5.2507	0.547247		25.1	0	0.403699	0.446729				6.51758	9.06275	4.71417	11.9692		0.994579	8.37127	8.51328	12.4426		15.1167	0.36371	0.92566	0		0.315704	0.161581	0.411019	0.487215				147.445	54.7941
CCRC-M170				115.346	0.736125	0	1.78697		156.608	0.538167	1.24046	5.49582		58.9662	0.497216	2.18779	0		22.0963	0	0.454161	1.00514				1.08626	0.509143	0	0.0981083		0.663053	0.30441	2.07641	0.234767		0.338433	0.167866	0.168302	0		0.105235	0.107721	0.246611	0.0304509				6.35537	0
LAMP	β-Glucan			0.0942373	1.65628	2.58893	5.95656		1.56384	2.51145	8.26976	0.91597		0.145595	0	1.31267	0.547247		0.846786	0.190324	0.100925	3.86421e-16				1.08626	0.814629	0.463688	1.37352		0.49729	2.89189	4.77574	2.34767		0.112811	0.0279777	0.0841509	1.21874		0.175391	0	0.164407	0.121804				22.8793	7.20975
BG1				0	0.736125	0.369847	6.55222		74.841	0.179389	2.48093	0		0.0727977	0	0.875116	1.09449		0.0239656	0	0.151387	0.0558411				0.325879	0.101829	0	0		0	0	1.0382	0.35215		0	0	0	0		0.0175391	0	0.0205509	0				8.89752	0
CCRC-M131	HG			45.0454	91.6475	259.633	470.568		188.778	116.424	262.978	737.356		25.2972	106.404	114.203	233.127		13.3888	38.8896	29.47	70.4715				271.566	128.61	107.808	294.521		75.588	293.755	436.669	155.181		205.767	20.3957	27.2649	110.905		42.0939	32.1009	26.1819	65.1041				1395.64	526.311
CCRC-M38	Backbone-1			58.9297	116.492	286.632	415.768		102.99	139.385	211.706	606.372		41.3127	8.28694	7.00093	9.85045		17.447	37.7476	27.9561	58.1864				251.796	147.041	107.885	274.311		53.21	265.293	408.637	208.473		219.53	0.223821	1.26226	0.677076		48.1273	29.7041	29.1823	59.3184				1184.64	560.918
JIM5				86.07	200.226	505.581	676.07		337.79	242.534	473.03	851.394		40.2935	164.744	38.0676	198.103		26.2024	56.3994	33.4061	94.2598				320.23	135.228	111.826	285.888		139.075	317.652	489.617	329.613		177.339	18.829	22.2158	89.5094		57.7387	42.3882	44.7188	97.5648				1062.62	295.6
JIM136	HG			38.1347	0	8.50649	26.8045		85.7879	0.717557	21.5014	4.12186		5.20504	0.165739	7.87605	3.28348		6.87015	0.570972	0.958784	0.279206				7.82109	0.254572	0.115922	2.74703		32.6554	1.21764	8.51328	9.62544		0	0.279777	1.00981	1.48957		0.631408	0.107721	0.595977	0				61.0116	0
JIM7	Backbone-2			59.0553	21.7157	11.8351	32.1654		207.321	3.76717	69.4659	1.37395		22.5309	1.65739	22.3155	0		14.6989	1.45915	1.00925	0.558411				6.73483	11.2011	1.39107	2.94325		79.8979	3.1963	9.96676	47.6577		2.93308	1.31495	4.20754	1.21874		0.876955	0.484744	0.452121	0.669921				20.3372	4.32585
CCRC-M69				12.565	26.8686	49.9294	136.405		2.68087	132.389	195.166	163.959		0.0363989	0.331477	5.68825	0		10.0656	10.2141	23.3136	42.2159				34.3259	17.82	12.5196	31.1984		1.16034	153.423	308.97	102.124		0	0.125899	0.841509	1.21874		8.24338	6.30168	19.5645	22.351				180.493	60.5619
CCRC-M35				20.1039	45.8238	100.968	181.079		165.991	148.893	235.275	246.854		20.9657	20.5516	41.1305	24.6261		10.7206	22.4582	30.8829	53.2724				54.3131	43.2772	29.3669	65.9288		63.4873	163.468	317.275	194.387		48.5087	1.8745	2.60868	1.21874		16.9428	7.10959	21.9895	36.6629				378.78	184.569
CCRC-M36	RG-I			19.6642	36.8062	93.9412	169.762		185.204	187.282	289.855	287.614		15.1783	11.436	10.5014	8.20871		10.5129	14.4012	27.3506	48.8051				51.4888	36.0473	23.1844	45.9147		63.9017	179.45	361.503	185.935		28.4283	1.20304	2.01962	1.21874		12.6983	4.87438	22.2361	30.3291				287.263	128.333
CCRC-M14	Backbone			10.1148	88.335	151.268	204.31		203.076	248.095	267.113	480.884		7.97135	31.3246	0	0		2.41254	0	1.96803	0				36.7157	51.118	41.191	60.4347		71.0296	196.801	272.425	220.916		59.1129	2.3781	0	1.21874		0	0	2.34281	0				0	87.9589
CCRC-M129				18.0307	42.6952	82.4759	187.632		211.342	153.378	390.332	236.778		4.44066	14.0878	26.2535	17.5119		9.12292	15.8603	41.6819	55.171				51.2716	27.5956	20.5569	50.0352		36.9652	147.03	280.938	207.769		37.6788	1.03517	3.53434	1.21874		12.4878	7.13652	28.237	35.6276				394.033	121.124
CCRC-M72				14.5754	25.2123	52.5183	112.579		2.01065	106.916	174.078	123.656		0.0181994	0	0	0		10.1614	8.81835	17.2581	31.4944				22.377	12.3213	8.42367	20.2103		1.65763	150.531	287.79	65.4999		0.338433	0	0.504905	1.21874		7.05072	5.03596	15.1666	16.0781				157.613	43.2585
JIM3				1.44497	28.7089	11.0954	52.4177		92.7135	24.2175	50.032	8.24373		1.41956	1.24304	39.3802	1.36812		1.45392	0.380648	0.807397	2.73621				19.5527	24.4389	1.39107	10.3995		102.773	12.1764	23.2558	24.181		32.9408	13.3174	52.7626	1.21874		2.24501	0.592465	1.93179	2.43607				63.5537	14.4195
CCRC-M40	Linseed Mucilage			3.83231	32.5735	49.5595	43.4829		83.3304	66.5534	109.988	314.178		22.1669	96.7914	149.645	256.659		13.964	10.8485	5.04623	19.2093				104.498	41.0369	30.6807	90.0634		42.9327	80.8208	119.394	63.8566		96.5661	29.3486	67.2365	1.21874		26.484	9.47945	5.38435	11.0232				111.855	44.7004
CCRC-M161	RG-I			0.188475	1.65628	4.43817	9.5305		3.5745	1.43511	6.6158	11.4496		0.0727977	0.994432	8.75116	2.18899		0.175748	3.29895	2.22034	2.34533				1.30352	1.12011	0.772814	2.94325		1.32611	2.43528	6.43687	1.17383		1.80497	0.307754	0.589056	1.21874		0.280626	0.565535	1.93179	1.09623				40.6744	12.9775
CCRC-M164				0.0314124	1.28822	4.06832	41.1003		2.45747	0.717557	3.72139	3.66388		0.0909972	0.828694	10.939	1.64174		0.455347	0.380648	2.01849	0				5.64857	2.44389	7.10989	21.5838		0.828816	3.65292	16.4036	0.939067		2.0306	5.53958	17.3351	1.21874		0.561251	0.121186	0.0822037	0.182706				53.3851	4.32585
CCRC-M98	Physcomitrella			0	0.276047	2.03416	8.93484		6.92559	3.76717	13.6451	12.3656		0.764376	1.49165	6.56337	0		1.48587	1.01506	0.605548	1.00514				2.82428	0.610972	0.772814	3.5319		4.64137	5.02276	11.8355	15.0251		2.93308	0.699442	1.76717	1.21874		0.912033	0.619396	0.328815	1.03533				27.9636	5.04682
CCRC-M94	Pectin			0.816723	4.60078	4.43817	7.74353		10.9469	3.04962	21.5014	16.0295		0.0181994	1.16017	11.8141	6.56697		0.231668	0	1.41295	1.78692				3.04154	0.814629	1.00466	5.69028		2.56933	3.95733	15.7807	18.077		1.91778	2.23821	2.60868	1.21874		0.841877	0.188512	0.65763	0				58.4694	15.8614
CCRC-M5	RG-Ia			0.0942373	8.8335	11.0954	19.061		14.298	0.98664	1.8607	13.7395		0.909972	0.414347	6.12581	0		5.57601	0.190324	7.56935	22.0014				1.84665	3.05486	0.695533	4.12055		5.30442	0.989332	6.22923	8.68637		7.2199	0.23781	1.43056	1.21874		4.13923	0.861768	4.64451	8.76987				66.0959	34.6068
CCRC-M2				0.816723	11.0419	5.91756	100.666		10.0533	1.52481	3.92813	35.2648		0.218393	1.49165	1.31267	3.28348		4.42566	1.30055	6.25733	13.4019				1.73802	1.22194	0	3.72812		1.98916	0.989332	1.97259	5.39964		0.902487	0.279777	2.35622	1.21874		6.38423	1.23879	3.94578	7.12552				0	10.0936
JIM137	RG-Ib			31.4124	6.07303	28.4782	51.8221		170.012	17.5801	96.3427	5.9538		7.64376	0.165739	8.75116	3.00986		8.89924	2.22045	3.33051	8.37617				5.86582	0	0	1.27541		4.9729	0.456615	3.11461	38.5017		0.451244	0.251799	1.34641	1.21874		2.10469	0.403954	0.863139	0.63947				17.795	0
JIM101				2.26169	6.25706	13.6843	42.2916		141.639	85.5686	152.99	35.2648		1.09197	11.9332	10.5014	10.3977		2.78002	1.39571	2.62404	1.45187				11.9489	3.564	2.24116	5.10163		71.6097	63.6216	111.918	45.0752		18.0497	2.49001	12.4543	1.21874		5.7879	1.64275	2.34281	2.00976				29.2347	8.65169
CCRC-M61				0.628248	2.39241	2.21908	2.97828		183.416	6.45801	19.0204	5.9538		9.6457	4.14347	11.3765	7.66146		1.94921	0.570972	1.41295	1.39603				1.95527	0.916457	0.309126	0.784867		29.5887	4.26174	9.96676	0.821684		15.5679	0.727419	1.34641	1.21874		2.70102	0.996419	0.780936	0.487215				17.795	2.16292
CCRC-M30				0	0	0	0		0	0	0	0		0	0	0	0		0	0	0	0				0	0	0	0		0	0	0	0		0	0	4.29169	1.21874		0	0	0	0				0	0
CCRC-M23	RG-Ic			18.4705	99.5609	248.907	329.993		14.0746	71.2175	116.19	249.144		0.764376	62.9807	10.939	29.5513		0.814832	27.2163	16.3498	83.3149				66.4793	93.9878	61.2069	124.99		23.2897	244.137	332.848	54.2311		26.6234	4.19665	4.7966	1.21874		18.0653	21.1402	17.3861	60.6583				1088.04	315.787
CCRC-M17				12.0624	73.2444	227.086	356.798		3.7979	55.6106	81.8706	8.24373		0.218393	37.6227	6.56337	23.5316		1.18231	15.2259	5.04623	46.2364				49.3163	59.977	53.015	119.3		9.53139	119.024	218.853	47.4229		7.67114	1.37091	2.60868	1.21874		5.29681	12.1455	6.24748	23.7517				312.684	89.4008
CCRC-M19				0.251299	7.72931	19.6019	38.7176		2.90428	3.04962	4.96185	2.28992		0.181994	1.16017	1.31267	1.09449		0.431382	0	0.908322	2.68037				1.08626	1.83291	1.08194	1.96217		0.994579	2.89189	8.30564	0.469534		0.676865	0.0419665	0.589056	1.21874		0	0.148116	0.863139	1.03533				25.4215	4.32585
CCRC-M18				14.8895	97.9046	254.085	417.555		6.03196	81.4427	114.123	1.83194		0.200194	43.755	8.3136	18.6064		2.04507	18.398	19.8822	47.2416				69.7381	82.1757	68.0849	160.898		21.1348	196.953	347.383	43.6666		15.5679	2.18226	2.60868	1.21874		9.78682	20.09	12.2073	36.5411				790.609	213.408
CCRC-M56				8.92113	74.5326	187.513	283.532		2.01065	74.6259	128.181	332.497		0	0.0828694	1.31267	0		1.6776	2.72798	15.0378	25.7986				83.2077	60.7917	53.2469	119.496		0	222.067	369.393	46.4838		0	0.0419665	0.252453	1.21874		4.10415	2.36986	12.906	15.4691				663.501	284.064
CCRC-M16				20.795	116.86	315.11	436.616		30.3832	106.198	171.597	80.1473		0.582382	98.946	6.56337	24.6261		5.14463	36.7326	32.4977	90.5743				157.943	94.0896	75.2721	183.463		46.4137	230.134	377.699	85.6899		47.8318	3.69305	2.77698	1.21874		30.8688	32.7472	25.6476	71.0725				755.019	233.596
CCRC-M60	RG-I/Arabinogalactan			13.9471	37.7264	91.3523	290.085		6.47877	93.9999	197.234	476.762		0.0909972	1.98886	7.43849	4.37798		16.3765	19.7303	24.121	50.257				77.3419	37.7784	35.9359	105.172		5.30442	91.6273	141.403	114.566		2.93308	0.167866	2.27207	1.21874		27.8872	14.1922	19.359	29.2938				455.045	138.427
CCRC-M41				9.98915	37.3583	79.887	153.084		68.1388	97.7671	163.328	457.985		20.7838	100.603	120.766	261.037		13.948	9.76997	11.2026	22.3364				82.9905	41.5461	34.3129	107.134		21.7979	104.108	145.972	118.088		62.7228	27.1943	23.0573	1.21874		23.9935	9.66796	10.1111	16.6871				317.769	121.124
CCRC-M80				34.4908	121.277	216.361	413.981		167.331	196.969	417.209	804.221		9.28171	30.6617	42.8807	66.2169		22.8952	27.2798	26.846	66.3392				237.022	124.231	103.48	261.753		85.2023	217.044	314.784	298.858		69.7171	13.1215	22.3	1.21874		41.9535	21.7327	31.9773	48.1125				1146.51	498.914
CCRC-M79				27.7058	92.1996	226.346	366.328		186.991	152.122	330.79	773.994		40.5847	163.253	265.598	413.172		21.633	25.6938	31.7913	60.5318				178.582	92.9695	78.0542	199.749		101.447	189.495	290.697	235.941		258.111	43.2535	116.801	1.21874		38.2002	19.2551	28.9357	40.987				1067.7	447.004
CCRC-M44				3.14124	16.5628	34.3958	73.2657		9.15965	62.7862	110.815	341.199		0.127396	0.662955	2.40657	0		10.8165	9.00867	7.3675	17.0874				27.1566	14.256	10.5103	31.9833		0.911698	60.2731	106.312	64.5609		0.112811	0.0279777	0	1.21874		15.8554	6.00545	5.01443	8.40446				183.035	41.8165
CCRC-M33				4.27209	13.0662	38.0943	48.2481		70.1495	58.8396	112.055	387.455		20.2742	118.006	124.266	266.509		11.5514	13.1958	8.78045	24.235				29.9808	15.1725	11.9786	32.7682		20.2231	57.3812	78.2806	90.8547		48.9599	28.1455	33.1554	1.21874		17.4339	5.62842	4.52121	12.5458				170.324	56.236
CCRC-M32				2.45017	9.75365	29.9576	46.4612		50.7132	42.874	85.592	312.804		17.2167	107.067	90.137	228.202		8.22821	10.4044	5.95456	21.8897				22.8115	11.6085	10.1239	25.7044		16.2448	45.5093	64.5763	67.8476		40.8375	19.0248	23.8147	1.21874		11.1549	4.57814	2.38391	6.5165				129.65	33.1648
CCRC-M13				28.4596	90.5433	174.198	443.168		232.342	192.485	365.11	687.893		42.0043	187.285	291.414	447.101		21.2655	22.712	28.0571	50.5921				192.486	99.2829	78.1315	196.805		92.0815	197.105	288.621	259.182		255.404	41.0153	77.5029	1.21874		37.4285	14.2461	25.4421	37.8201				1057.53	442.678
CCRC-M42				4.27209	10.1217	28.4782	57.183		66.3516	50.229	97.9966	330.665		20.0922	95.9627	95.8252	213.426		12.2704	13.0689	10.1934	29.4841				26.0703	12.6267	10.7421	34.3379		23.787	59.0555	90.7391	53.7616		58.8873	23.2215	13.8849	1.21874		16.4166	6.35554	7.02842	10.4751				183.035	31.7229
CCRC-M24				17.0255	55.0253	97.2698	188.227		128.235	125.393	230.726	544.544		27.8451	143.033	201.277	379.242		14.7469	15.7969	13.6248	28.814				95.5911	54.1728	47.0644	123.813		52.3812	141.551	181.686	150.251		143.495	44.4565	86.7595	1.21874		26.5893	9.53331	13.6047	21.742				498.261	161.498
CCRC-M12				8.48135	31.4693	90.6126	197.758		174.257	127.366	226.178	704.839		40.0752	181.981	180.711	403.868		16.025	30.4519	22.809	56.1762				46.492	26.6791	21.8706	89.4748		44.839	123.286	213.04	173.727		161.545	41.6867	34.2494	1.21874		28.2029	13.0612	12.5361	24.848				668.585	278.296
CCRC-M7				5.90553	24.6602	48.45	96.4963		155.714	87.7213	181.108	462.107		28.4639	130.934	124.266	311.384		13.261	14.0205	8.9823	22.5598				42.5815	19.9584	13.6015	44.7374		35.1418	85.2347	122.093	96.4891		88.6693	25.9353	19.1864	1.21874		15.5046	8.02521	6.5763	10.1097				213.541	76.4233
CCRC-M77				1.94757	16.1947	50.2992	60.7569		146.108	37.8511	76.9087	664.536		9.97329	78.2287	135.205	205.218		13.0533	12.4345	12.2119	37.5252				11.9489	7.33166	6.33708	17.8557		76.0853	50.6842	123.754	51.4139		86.4131	21.7107	45.9464	1.21874		14.6978	4.82051	5.71316	7.67364				129.65	50.4682
CCRC-M25				17.9051	62.3866	144.98	253.154		115.724	116.244	224.11	528.515		27.6631	147.01	203.902	352.427		17.3192	24.3615	22.5062	53.0491				94.9393	55.9039	47.9918	120.477		50.4749	140.79	169.643	148.373		144.398	26.6627	69.9294	1.21874		33.5348	19.2013	22.8937	38.9163				597.405	204.757
CCRC-M9				37.4436	108.21	188.992	450.316		183.863	177.954	328.309	687.435		33.0138	181.152	310.666	444.365		21.4413	27.6604	40.3699	62.8771				177.93	105.698	90.4965	237.815		80.5609	200.758	201.412	215.985		206.444	34.5524	98.0358	1.21874		41.4624	24.3988	36.0052	49.3914				973.643	331.648
CCRC-M128				9.54937	34.9659	74.3393	172.74		157.948	92.9236	207.157	456.611		16.9255	119.663	164.959	345.86		13.4847	15.8603	16.4507	37.7486				52.1406	24.1334	22.8753	71.6191		28.5942	75.1892	112.957	110.34		77.3883	25.1519	37.1947	1.21874		19.4684	7.27117	8.96021	13.1548				394.033	116.798
CCRC-M126				8.16723	37.9104	69.5313	145.34		195.704	123.958	260.497	495.54		32.6498	142.37	139.581	298.797		15.7694	18.3346	8.88137	28.3673				78.4282	41.6479	27.6667	85.3542		39.7832	106.087	148.256	127.009		118.226	31.5029	44.1792	1.21874		25.2212	11.0414	4.68561	13.1548				272.01	129.775
CCRC-M134				14.0728	63.1227	156.815	350.841		199.055	131.492	427.96	666.826		33.4142	192.257	224.905	402.774		23.6142	35.3368	33.6079	67.5678				78.6454	39.9168	43.2776	119.104		28.2626	154.336	227.99	204.951		128.83	45.8554	57.1384	1.21874		40.0593	17.747	20.7975	33.6787				681.296	307.135
CCRC-M125				9.29808	36.9903	73.9694	157.253		159.065	98.4847	210.465	450.199		27.9543	123.475	177.211	330.537		14.5072	23.6636	19.5794	42.5509				64.7412	33.9089	31.9172	99.4818		39.2859	110.501	143.687	127.478		113.713	33.3214	58.7373	1.21874		26.5191	9.3448	12.1662	22.96				444.876	142.753
CCRC-M123				14.701	80.9737	153.117	263.876		254.236	152.84	344.022	820.251		41.3127	164.744	242.407	415.908		20.8501	19.8571	19.2766	47.8				113.406	62.6246	55.4108	174.24		74.7592	168.186	258.098	154.007		184.333	48.3734	117.559	1.21874		39.3227	16.8583	17.6327	30.6945				625.369	286.948
CCRC-M122				21.0463	100.113	166.431	329.993		209.331	154.992	334.512	757.049		39.3472	174.689	255.534	412.077		21.2495	28.1045	31.0848	56.6229				150.99	78.5099	67.544	198.375		72.5214	181.58	268.48	169.736		172.375	49.7163	117.98	1.21874		43.6022	18.3664	22.3183	34.8359				755.019	380.675
CCRC-M121				20.795	97.7206	204.156	350.841		160.406	178.492	566.892	839.944		43.1327	196.069	264.285	435.609		21.5691	24.1077	19.4785	55.7294				155.118	88.8964	70.017	202.692		84.705	174.731	279.485	211.994		222.237	45.7715	63.2815	1.21874		39.5682	17.5855	20.2632	38.5509				782.982	421.049
CCRC-M112				2.26169	9.56962	28.1084	48.8438		115.724	56.687	134.797	255.556		22.2033	117.343	70.4469	215.068		8.59568	11.1022	5.04623	19.8794				14.9904	7.73897	6.80076	16.6784		22.2123	45.9659	77.45	59.1612		53.0211	23.6132	11.5287	1.21874		9.40096	3.90489	2.95933	5.66387				134.734	66.3297
CCRC-M21				7.47616	28.8929	72.1202	142.957		94.5007	82.3396	131.903	498.288		30.6842	137.895	158.834	314.667		16.2327	18.7786	14.9369	33.728				54.0959	28.4102	24.1891	78.8791		29.5887	105.935	132.475	59.6308		104.237	29.8242	31.5566	1.21874		31.5704	11.7685	9.94665	16.1999				241.504	69.2136
JIM131				16.3973	79.8695	163.103	281.15		180.065	124.317	252.228	768.499		25.0424	156.789	252.471	407.699		23.5822	30.325	36.0301	88.7874				100.805	48.9796	45.6733	120.281		89.3464	145.051	217.4	114.566		107.396	48.5413	129.592	1.21874		39.3928	15.6734	29.47	41.596				762.645	327.322
CCRC-M22				55.0974	139.128	271.838	670.113		222.959	237.511	452.769	851.394		37.3816	137.232	332.107	707.043		24.8284	35.2734	62.977	78.2892				273.086	150.095	121.409	333.765		109.238	270.925	374.169	181.709		273.228	41.7707	96.521	1.21874		52.5822	35.3056	56.885	75.5183				1690.53	692.136
JIM132				13.4445	31.1013	82.1061	129.257		91.3731	31.2137	76.9087	382.875		6.297	71.9306	92.3248	188.8		11.8231	8.37426	10.5971	30.3776				58.2237	23.5224	21.407	50.4277		37.7111	35.7681	79.9417	29.1111		20.306	9.90409	22.3841	1.21874		14.4522	3.23163	11.2619	13.9465				353.359	132.659
JIM1				3.45537	182.927	128.707	475.334		409.28	144.588	313.837	724.99		9.6457	65.3011	77.8853	89.7485		10.1774	9.89685	11.9091	33.5047				70.6071	58.6533	27.4349	104.78		85.2023	129.526	137.458	210.116		165.832	14.7163	24.0671	1.21874		19.714	3.52786	4.60341	6.82101				106.77	54.7941
CCRC-M15				22.0515	67.5394	147.199	400.877		152.586	144.767	232.794	604.082		27.4083	165.407	269.536	370.486		7.58912	3.48928	9.99154	12.1734				114.275	61.7081	54.1743	163.645		59.6748	154.945	187.084	200.491		158.612	35.4197	50.4905	1.21874		9.78682	4.22805	9.24792	10.3533				587.237	223.502
CCRC-M8				10.8687	53.5531	126.858	212.649		117.512	99.7404	164.155	437.376		19.4734	120.658	174.586	255.017		14.9066	15.1625	14.9369	28.7023				95.1566	53.8673	36.3223	100.07		45.9164	118.111	119.394	102.358		134.922	24.3406	15.9045	1.21874		31.0442	13.2228	14.6323	19.1841				421.997	121.124
JIM16				5.27729	30.5492	38.4641	87.5614		260.268	119.832	199.715	57.2481		3.49429	24.0321	29.7539	8.20871		4.23393	1.20539	2.52312	4.13224				35.4122	19.9584	5.02329	14.9125		110.647	79.7554	83.4716	18.7813		40.6119	6.40689	9.84565	1.21874		6.279	1.13107	2.2195	2.19247				50.843	11.5356
JIM93	Arabinogalactan-1			0.942373	4.6928	5.91756	57.183		90.256	27.9847	194.339	5.03783		1.09197	0.662955	13.5643	1.36812		0.127817	0.190324	5.55086	1.34019				10.8626	7.53532	0.115922	6.08272		76.5826	17.3514	81.8105	105.645		11.5067	3.02159	7.40528	1.21874		0.420939	0	2.3017	2.55788				22.8793	0
JIM94				1.19367	5.70497	23.3004	54.2047		120.639	32.4694	287.787	9.61768		0.691578	1.57452	12.2516	5.47247		0.447359	0.539252	8.9823	6.36589				6.73483	1.83291	1.15922	2.15838		27.1852	19.9388	96.9683	96.9587		9.02487	1.28697	7.82603	1.21874		1.82407	0.430884	2.67162	2.31427				7.62645	16.5824
JIM11				1.44497	6.80915	19.2321	69.6918		183.64	80.9045	88.0729	2.74791		0.691578	1.98886	8.75116	0		0.351496	0.47581	4.23884	5.69579				9.99362	7.33166	0.618251	2.15838		78.3231	47.1835	125.83	196.265		9.47611	2.18226	6.56377	1.21874		1.15758	0.888698	2.1373	3.2887				3.81322	0
MAC204				4.33491	12.8822	65.463	73.2657		176.714	106.019	258.843	24.7312		2.62072	6.29807	36.3173	19.7009		2.57231	3.99681	34.7181	32.4995				23.8978	10.9975	8.65552	9.22218		61.6639	76.1024	209.51	208.238		11.958	3.55316	9.84565	1.21874		8.13815	3.42014	9.24792	14.4946				109.312	30.2809
JIM20				4.46056	12.5141	57.3263	83.9875		86.6815	146.023	455.664	5.03783		1.01917	0	13.1267	4.10435		1.7415	2.66454	38.2505	21.778				21.2907	7.33166	6.10523	11.773		50.5578	106.543	259.136	251.905		13.0861	2.60192	6.73207	1.21874		5.68267	1.56195	9.04241	12.7894				22.8793	0
JIM14	Arabinogalactan-2			40.7733	107.658	218.95	564.682		234.8	166.832	456.904	715.372		42.4775	267.005	342.17	478.841		19.8755	29.9443	29.9746	59.75				158.377	91.2384	69.3987	209.952		110.315	170.622	221.345	215.751		184.784	40.9313	67.6573	1.21874		38.2703	17.5855	22.2361	35.1404				938.053	360.487
JIM19				19.2872	65.3311	151.637	225.754		306.513	277.874	721.95	38.0127		17.5807	169.716	561.825	441.628		7.0459	25.3131	77.3083	61.4252				79.2972	39.9168	22.0252	51.2125		134.517	223.132	378.322	331.491		198.773	36.2311	74.1369	1.21874		19.8543	14.5693	22.2772	31.6081				165.24	25.9551
JIM12				8.73265	36.0701	40.3133	69.6918		136.278	66.1946	5.37534	7.32776		2.83911	17.4026	119.891	59.1027		1.70955	3.61616	14.0285	6.70093				19.5527	12.5249	3.86407	6.86758		77.0799	45.2048	182.724	220.446		23.6903	4.25261	15.063	1.21874		3.78845	0.673256	3.57586	4.26313				40.6744	4.32585
CCRC-M133				16.8371	162.131	211.183	118.536		240.832	169.523	308.875	196.018		4.29507	31.8218	21.0028	5.47247		0.750924	0.824738	3.33051	7.14766				8.03834	5.7024	3.70951	10.007		20.306	33.1807	91.362	161.989		2.0306	0.307754	0.92566	1.21874		0.771721	0.323163	1.35636	2.43607				195.746	99.4945
CCRC-M107				23.0567	172.805	253.715	253.154		197.938	228.004	385.371	264.715		7.24337	45.0809	38.5051	26.2679		1.75748	1.90324	8.9823	17.8692				33.2396	17.5145	13.7561	57.8839		28.0969	90.1053	133.928	212.699		9.47611	1.31495	1.76717	1.21874		2.10469	1.99284	6.37079	9.6225				297.432	152.847
JIM4	Arabinogalactan-3			0.691073	7.91334	11.8351	20.848		156.161	70.1412	122.806	14.6555		6.11501	44.418	28.8788	8.20871		0.0798855	0	1.31202	2.12196				5.64857	8.14629	0.850096	3.92433		85.451	65.4481	81.6029	107.523		83.0288	7.58195	5.89056	1.21874		0.561251	0.323163	0.65763	0.669921				35.5901	0
CCRC-M31				1.57062	3.49659	11.8351	12.5088		127.341	120.908	195.993	50.8363		1.31036	1.49165	7.43849	5.47247		4.58543	1.45915	2.11942	5.0257				6.95208	2.24023	1.08194	2.55082		49.0659	92.0839	136.005	157.998		2.70746	0.307754	1.17811	1.21874		5.36697	0.673256	2.2606	2.74058				27.9636	10.8146
JIM17				14.6382	26.1324	22.1908	51.2264		174.927	108.53	145.134	38.4707		3.3123	16.0767	10.939	1.36812		0.511267	0	1.61479	0.335047				47.1438	16.5981	2.85941	10.2033		90.6725	65.9047	102.575	47.6577		37.002	4.08474	5.97471	1.21874		1.1225	0.0807907	0.780936	1.82706				137.276	7.20975
CCRC-M26				0.188475	1.56427	1.66431	7.14787		19.4363	4.30534	11.5777	3.20589		0.473185	0.662955	2.62535	1.09449		0.750924	0.761296	0.706473	2.01028				1.08626	1.0692	0.347766	0		3.97832	4.10953	8.72092	3.05197		2.0306	0.335732	0.504905	1.21874		1.68375	0.296233	0.328815	0.791724				12.7107	7.93072
JIM15				49.5688	165.812	279.974	663.561		250.885	214.549	409.353	541.338		18.3814	154.468	360.985	381.431		22.7514	34.3852	57.0224	77.7308				236.588	132.785	113.913	275.488		129.378	236.374	278.862	87.8028		194.035	45.6875	129.256	1.21874		35.7798	21.9751	36.3752	56.2124				1522.75	571.012
JIM8				47.3699	170.045	224.867	539.069		259.151	221.546	499.08	623.317		24.6056	181.815	413.93	395.112		21.9845	31.7207	46.7281	69.6897				241.368	149.79	113.295	265.481		142.142	242.006	307.516	265.052		205.09	48.4853	120.588	1.21874		33.5698	17.6393	36.0463	57.3696				1349.88	523.428
CCRC-M85				21.1091	38.2785	133.145	180.484		4.69153	150.328	280.758	260.135		0.181994	0.331477	7.87605	5.47247		19.0447	15.9238	20.4877	45.7897				96.8946	51.6271	34.7766	77.7018		0.911698	156.01	237.126	253.313		0	0.139888	0.757358	1.21874		30.5882	12.1994	21.1264	25.9442				483.008	226.386
CCRC-M81				21.6117	46.0078	125.008	179.888		31.5002	149.072	318.799	343.031		0.218393	4.47495	6.12581	3.28348		19.3323	13.2592	19.0748	43.1093				102.76	43.5826	34.7766	69.6569		4.64137	160.881	239.41	251.67		2.93308	0.111911	1.43056	1.21874		29.5359	11.2568	17.7149	24.6044				411.828	181.686
MAC266				1.31932	4.23272	42.5324	35.7394		154.597	151.046	487.089	7.78574		0.909972	4.30921	26.691	0		0.750924	0.47581	3.83514	4.24393				25.2013	13.5432	24.6528	28.2552		94.2364	125.873	348.837	119.848		27.0746	11.7226	21.5426	1.21874		1.96438	2.0467	6.98732	2.37517				213.541	79.3072
PN 16.4B4				11.7482	36.9903	74.7091	122.109		69.0325	77.3167	168.703	178.156		2.69352	22.7062	36.3173	37.7601		12.9574	6.02693	10.2943	25.0168				58.8754	34.4181	26.8166	60.8272		23.5384	72.6017	82.2258	92.2633		16.696	5.84733	10.0981	1.21874		16.2061	4.57814	10.2755	16.0172				312.684	152.847
MAC207	Arabinogalactan-4			7.6018	97.9046	310.302	446.742		191.459	224.236	340.3	525.767		9.13612	128.945	235.406	393.471		17.8624	58.4929	59.8483	87.4472				50.8371	110.484	100.389	128.129		115.869	192.539	267.857	188.048		303.236	37.7978	120.336	1.21874		30.8688	19.5514	30.0455	34.5314				3055.66	1110.3
JIM133				22.8054	112.811	162.733	311.528		171.129	158.939	334.098	191.896		8.95412	97.7858	205.652	284.021		12.4142	14.7818	20.084	30.3776				180.971	110.179	83.7731	206.027		108.078	200.606	205.98	129.826		94.3099	42.582	99.1297	1.21874		24.3443	13.5459	16.1941	22.96				582.152	148.521
JIM13				90.3421	285.064	590.276	916.715		336.673	346.58	585.085	837.196		57.3282	327.831	739.036	843.855		30.1648	78.4135	99.3099	109.895				398.441	187.67	173.96	397.143		151.342	318.565	449.543	330.082		451.018	43.0297	148.526	1.21874		60.6853	41.5803	52.6926	91.7791				3642.9	1457.81
CCRC-M92				13.9471	41.039	88.3935	165.592		151.916	133.645	274.556	321.505		0.363989	8.94989	17.0648	10.3977		16.6961	7.16887	18.2674	31.0477				90.1598	44.0918	34.3902	89.671		4.0612	156.923	224.045	154.242		2.93308	0	0.841509	1.21874		29.0097	8.9947	19.2768	24.7262				376.238	155.731
CCRC-M91				11.6854	20.6115	53.9977	105.431		165.544	140.462	258.016	197.849		8.69933	32.4848	58.6328	95.221		17.0476	7.86673	13.0193	27.3621				53.4441	28.3084	17.6202	47.2882		80.9753	112.784	172.342	198.143		62.046	13.0096	27.2649	1.21874		26.3788	8.9947	16.7696	20.9502				238.962	116.798
CCRC-M78				23.1195	59.4421	112.434	208.48		176.044	158.401	353.946	419.056		36.6173	150.822	215.279	410.435		21.0259	18.5883	25.6349	52.1556				121.01	73.3166	61.516	138.137		81.3898	160.728	218.438	209.412		202.157	46.0512	105.273	1.21874		33.5698	19.2551	26.6751	37.1501				559.273	184.569
MAC265	Unidentified			1.06802	2.57644	11.0954	29.1871		5.36174	4.30534	9.92371	10.9916		0.873573	3.97773	10.5014	13.1339		0.38345	1.52259	2.42219	2.68037				5.86582	2.24023	0.386407	2.3546		1.98916	3.65292	4.98338	5.6344		5.41492	0.671464	2.01962	1.21874		0.841877	0.646326	0.986445	1.46164				43.2165	11.5356
CCRC-M97				9.1096	58.5219	76.5584	140.575		161.299	189.614	229.899	294.942		1.81994	7.12676	11.8141	5.47247		0.99058	2.47421	10.3952	25.9103				53.6614	29.9376	22.257	50.8201		42.5183	129.374	193.729	159.407		20.9828	0.531576	1.51472	1.21874		5.1565	2.18135	8.26148	10.5969				226.251	105.262
[truncated: 64 more columns]
